# Supplementary material for: The Mitochondrial PHB2/OMA1/DELE1 Pathway Cooperates with Endoplasmic Reticulum Stress to Facilitate the Response to Chemotherapeutics in Ovarian Cancer
Source: MDPI journal article supplement (doi:10.3390/ijms23031320), 2022-01-25
Supplement: s1 [file s1]

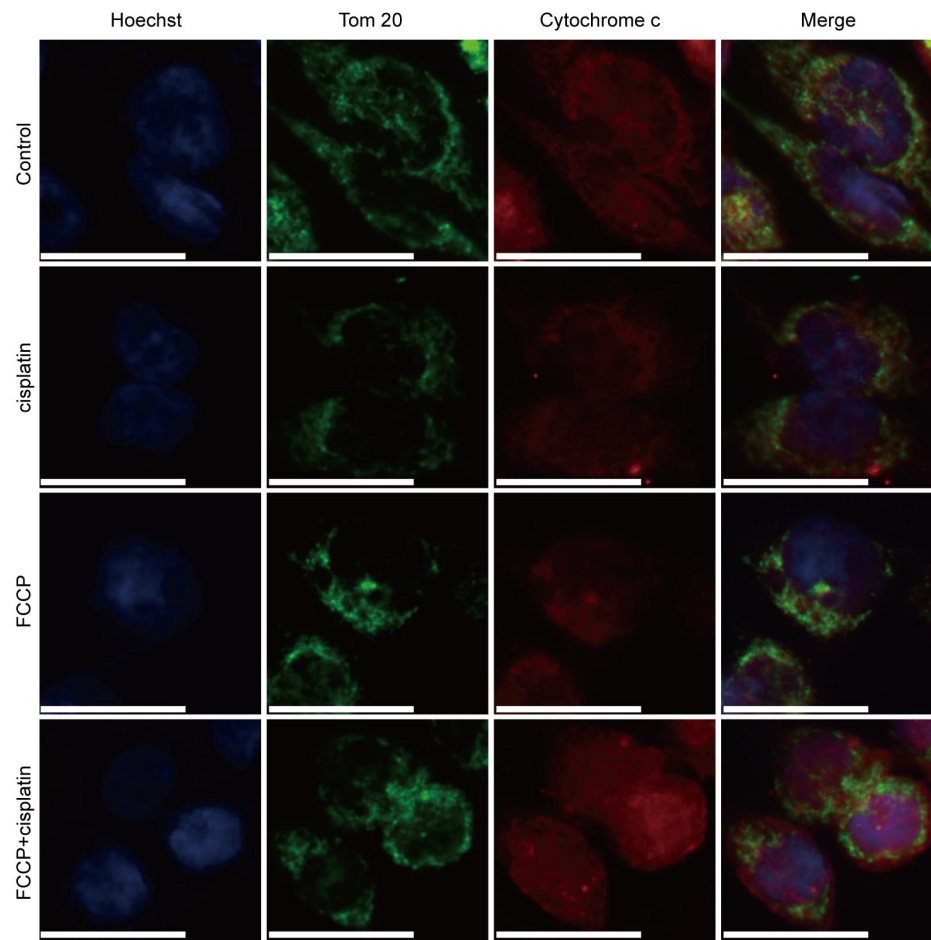

**Figure S1.** FCCP combined with cisplatin induced cytochrome c release. A2780 cells were treated with FCCP and/or cisplatin for 12 h. Colocalization of cytochrome c with Tom20 in A2780 cells was measured by immunofluorescence staining (scale bar, 30  $\mu$ m).
